# Supplementary material for: Health Professionals’ and Health Professional Trainees’ Views on Addictive Eating Behaviours: A Cross-Sectional Survey
Source: MDPI journal article supplement (doi:10.3390/nu12092860), 2020-09-18
Supplement: s1 [file s1]

## Supplementary File:

### Health professionals' and health professional trainees' views on addictive eating behaviours: A cross sectional survey - Additional results

#### Methods

##### *Opinions on weight gain*

Participants were asked to indicate the factors they think contribute to an individual gaining weight from a list of 8 predetermined options (*e.g. cultural, psychological, lifestyle, parental influences, public policies*).

##### *Treatment of individuals with disordered eating or overweight/obesity*

Participants were asked whether they provide advice to individuals with disordered eating or overweight/obesity, and whether they refer individuals with disordered eating or overweight/obesity to other health practitioners (*yes, no or not applicable*). Those that had provided advice were asked to indicate the types of assistance they provide to individuals with binge eating disorder and overweight/obesity separately from a list of 12 predetermined options or 'other, please specify'. They were also asked to rank the methods they believe are most effective for treatment/management from a selection of 6 methods or 'other, please specify'. Participants who had referred individuals to other health practitioners were asked to indicate the types of treatments they provide or refer to for individuals with binge eating disorder and overweight/obesity from a list of 6 predetermined options or 'other, please specify'. Two questions asked participants to rank potential barriers to delivering optimal treatment for weight management and for binge eating disorder from a selection of 6 barriers or 'other, please specify'.

#### Results

The major factors participants' reported that may contribute to weight gain were psychological factors and genetic/biomedical factors (n=131, 75% each), followed by environmental factors (n=130, 74%) (Supplementary Table 1). Among health professionals who provide treatment to clients, the most common type of treatment provided to clients with either overweight/obesity or binge eating disorder was behaviour change advice, reported by 77% (n=77) and 76% (n=68) of participants respectively.

**Supplementary Table 1** Opinions on weight gain, and treatment of individuals with disordered eating or overweight/obesity among health professionals participating in a survey on addictive eating (n=175)

|                                                                                      | N   | %    | N                                                                                       | %    |
|--------------------------------------------------------------------------------------|-----|------|-----------------------------------------------------------------------------------------|------|
| <i>Opinions on weight gain</i>                                                       |     |      |                                                                                         |      |
| <b>Factors that may contribute to weight gain</b>                                    |     |      |                                                                                         |      |
| Psychological factors                                                                | 131 | 74.9 |                                                                                         |      |
| Genetic/biomedical factors                                                           | 131 | 74.9 |                                                                                         |      |
| Environmental factors                                                                | 130 | 74.3 |                                                                                         |      |
| Lifestyle factors                                                                    | 128 | 73.1 |                                                                                         |      |
| Parental influences/childhood                                                        | 126 | 72.0 |                                                                                         |      |
| Social factors                                                                       | 117 | 66.9 |                                                                                         |      |
| Cultural factors                                                                     | 103 | 58.9 |                                                                                         |      |
| Public policies                                                                      | 69  | 39.4 |                                                                                         |      |
| <i>Experience/Opinions in treating disordered eating and overweight/obesity</i>      |     |      |                                                                                         |      |
| <b>Types of treatment provided to clients with overweight/obesity<sup>a, b</sup></b> |     |      | <b>Types of treatment provided to clients with binge eating disorder<sup>a, e</sup></b> |      |
| Behaviour change advice/strategies                                                   | 77  | 77.0 | 68                                                                                      | 75.6 |
| Healthy eating education                                                             | 76  | 76.0 | 52                                                                                      | 57.8 |
| Self-monitoring intake                                                               | 51  | 51.0 | 51                                                                                      | 56.7 |
| Refer to another health professional                                                 | 40  | 40.0 | 36                                                                                      | 40.0 |
| Psychological counselling                                                            | 31  | 31.0 | 32                                                                                      | 35.6 |
| Very low energy meal replacements                                                    | 26  | 26.0 | 16                                                                                      | 17.8 |
| Meal plan for 0.5-1kg/week weight loss                                               | 25  | 25.0 | 6                                                                                       | 6.7  |
| Bariatric surgery                                                                    | 24  | 24.0 | 5                                                                                       | 5.6  |
| Exercise regime                                                                      | 22  | 22.0 | 3                                                                                       | 3.3  |
| Medications                                                                          | 11  | 11.0 | 2                                                                                       | 2.2  |
| Combination of treatments                                                            | 11  | 11.0 | 2                                                                                       | 2.2  |
| Commercial weight loss programs                                                      | 8   | 8.0  | 1                                                                                       | 1.1  |
| Other                                                                                | 20  | 20.0 | 20                                                                                      | 22.2 |
| <b>Most effective methods for weight management<sup>b, c, d</sup></b>                |     |      | <b>Most effective methods for treating binge eating disorder<sup>c, d, e</sup></b>      |      |
| Diet                                                                                 | 72  | 56.7 | 23                                                                                      | 19.7 |

|                                                                                                                          |    |      |                                                                                                       |      |
|--------------------------------------------------------------------------------------------------------------------------|----|------|-------------------------------------------------------------------------------------------------------|------|
| Combination of treatments                                                                                                | 67 | 52.8 | 66                                                                                                    | 56.4 |
| Therapy/counselling                                                                                                      | 32 | 25.2 | 104                                                                                                   | 88.9 |
| Exercise                                                                                                                 | 28 | 22.0 | 1                                                                                                     | 0.9  |
| Surgery                                                                                                                  | 27 | 21.3 | 3                                                                                                     | 2.6  |
| Prescription drugs                                                                                                       | 3  | 2.4  | 7                                                                                                     | 6.0  |
| Other                                                                                                                    | 25 | 19.7 | 30                                                                                                    | 25.6 |
| <b>Barriers to delivering weight management treatment</b>                                                                |    |      | <b>Barriers to delivering binge eating disorder treatment</b>                                         |      |
| Time restrictions for clinicians                                                                                         | 68 | 38.9 | 64                                                                                                    | 36.6 |
| Time restrictions for clients                                                                                            | 66 | 37.7 | 56                                                                                                    | 32.0 |
| Waiting lists                                                                                                            | 62 | 35.4 | 84                                                                                                    | 48.0 |
| Limited effective options                                                                                                | 67 | 38.3 | 57                                                                                                    | 32.6 |
| No access to services                                                                                                    | 49 | 28.0 | 35                                                                                                    | 20.0 |
| Cost to clients                                                                                                          | 82 | 46.9 | 77                                                                                                    | 44.0 |
| Other                                                                                                                    | 61 | 34.9 | 56                                                                                                    | 32.0 |
| <b>Types of treatment provided/referred to for clients with overweight/obesity for weight management <sup>a, e</sup></b> |    |      | <b>Types of treatment provided/referred to for clients with binge eating disorder <sup>a, f</sup></b> |      |
| Diet                                                                                                                     | 54 | 77.1 | 43                                                                                                    | 46.7 |
| Exercise                                                                                                                 | 46 | 65.7 | 23                                                                                                    | 25.0 |
| Prescription drugs                                                                                                       | 16 | 22.9 | 10                                                                                                    | 10.9 |
| Surgery                                                                                                                  | 17 | 24.3 | 3                                                                                                     | 3.3  |
| Therapy/counselling                                                                                                      | 49 | 70.0 | 73                                                                                                    | 79.3 |
| Combination of treatments                                                                                                | 15 | 21.4 | 14                                                                                                    | 15.2 |
| Other                                                                                                                    | 7  | 10.0 | 17                                                                                                    | 18.5 |

Responses where percentages add to >100 were multiple response questions. <sup>a</sup> Responses are for health professionals only. <sup>b</sup> N=100 responses from health professionals (i.e. those who indicated they provide treatment for overweight/obesity). <sup>c</sup> reported as the N(%) who ranked responses as 1 or 2. <sup>d</sup> N=27 responses from health students. <sup>e</sup> N=90 responses from health professionals (i.e. those who indicated they provide treatment for binge eating disorder). <sup>f</sup> N=70 responses from health professionals.

**Supplementary Table 2.** Responses of participants in a survey on addictive eating, by health professionals and health professionals in training (n=175)

|                                                                                                                                             | Health professionals<br>(n=142) |      | Health professionals in<br>training (n=33) |      |
|---------------------------------------------------------------------------------------------------------------------------------------------|---------------------------------|------|--------------------------------------------|------|
|                                                                                                                                             | N                               | %    | N                                          | %    |
| <b>Have you experienced individuals asking or speaking about addictive eating?</b>                                                          |                                 |      |                                            |      |
| Yes                                                                                                                                         | 102                             | 71.8 | 24                                         | 72.7 |
| Maybe                                                                                                                                       | 11                              | 7.7  | 3                                          | 9.1  |
| No                                                                                                                                          | 29                              | 20.4 | 6                                          | 18.2 |
| <b>In your opinion, do you feel that people can develop compulsive patterns of eating that resemble an addictive disorder? <sup>a</sup></b> |                                 |      |                                            |      |
| Yes                                                                                                                                         | 91                              | 64.1 | 29                                         | 87.9 |
| Maybe                                                                                                                                       | 30                              | 21.1 | 3                                          | 9.1  |
| No                                                                                                                                          | 21                              | 14.8 | 1                                          | 3.0  |
| <b>In your opinion, does addictive eating exist? <sup>a</sup></b>                                                                           |                                 |      |                                            |      |
| Yes                                                                                                                                         | 76                              | 53.5 | 29                                         | 87.9 |
| Maybe                                                                                                                                       | 31                              | 21.8 | 2                                          | 6.1  |
| No                                                                                                                                          | 35                              | 24.6 | 2                                          | 6.1  |
| <b>In your opinion, do you feel that there are population group/s who may be more vulnerable to addictive eating? <sup>a, b</sup></b>       |                                 |      |                                            |      |
| Yes                                                                                                                                         | 56                              | 52.3 | 19                                         | 61.3 |
| Unsure                                                                                                                                      | 6                               | 5.6  | 12                                         | 38.7 |
| No                                                                                                                                          | 45                              | 42.1 | 0                                          | 0.0  |
| <b>How interested would you be in addictive eating being a diagnostic term? <sup>a</sup></b>                                                |                                 |      |                                            |      |
| Very interested                                                                                                                             | 30                              | 21.1 | 13                                         | 39.4 |
| Interested                                                                                                                                  | 30                              | 21.1 | 10                                         | 30.3 |
| Somewhat interested                                                                                                                         | 24                              | 16.9 | 5                                          | 15.2 |
| Not very interested                                                                                                                         | 20                              | 14.1 | 3                                          | 9.1  |
| Not at all interested                                                                                                                       | 38                              | 26.8 | 2                                          | 6.1  |
| <b>How interested would you be if there was a referral pathway for the treatment/management of addictive eating? <sup>a</sup></b>           |                                 |      |                                            |      |
| Very interested                                                                                                                             | 55                              | 38.7 | 17                                         | 51.5 |
| Interested                                                                                                                                  | 30                              | 21.1 | 11                                         | 33.3 |
| Somewhat interested                                                                                                                         | 18                              | 12.7 | 2                                          | 6.1  |
| Not very interested                                                                                                                         | 4                               | 2.8  | 2                                          | 6.1  |
| Not at all interested                                                                                                                       | 35                              | 24.7 | 1                                          | 3.0  |

| <b>Who do you think would be best placed to identify people with behaviours suggestive of addictive eating? <sup>c</sup></b>             |    |      |    |      |
|------------------------------------------------------------------------------------------------------------------------------------------|----|------|----|------|
| General Practitioner                                                                                                                     | 38 | 26.8 | 10 | 30.3 |
| Medical specialists                                                                                                                      | 20 | 14.1 | 10 | 30.3 |
| Psychologists                                                                                                                            | 69 | 48.6 | 24 | 72.7 |
| Psychiatrists                                                                                                                            | 36 | 25.4 | 15 | 45.5 |
| Counsellor                                                                                                                               | 33 | 23.2 | 16 | 48.5 |
| Dietitians/Nutritionists                                                                                                                 | 74 | 52.1 | 25 | 75.8 |
| All of the above                                                                                                                         | 59 | 41.6 | 16 | 48.5 |
| Other                                                                                                                                    | 28 | 19.7 | 2  | 6.1  |
| <b>Who do you think is best placed to provide treatment for people with addictive eating? <sup>c</sup></b>                               |    |      |    |      |
| General Practitioner                                                                                                                     | 11 | 7.8  | 5  | 15.2 |
| Medical specialists                                                                                                                      | 12 | 8.5  | 5  | 15.2 |
| Psychologists                                                                                                                            | 91 | 64.1 | 23 | 69.7 |
| Psychiatrists                                                                                                                            | 39 | 27.5 | 13 | 39.4 |
| Counsellor                                                                                                                               | 43 | 30.3 | 6  | 18.2 |
| Dietitians/Nutritionists                                                                                                                 | 84 | 59.2 | 23 | 69.7 |
| All of the above                                                                                                                         | 28 | 19.7 | 6  | 18.2 |
| Other                                                                                                                                    | 27 | 19.0 | 2  | 6.1  |
| <b>Are there any services you would be more likely to refer to or suggest to clients/individuals with addictive eating? <sup>c</sup></b> |    |      |    |      |
| Counselling                                                                                                                              | 62 | 43.7 | 15 | 45.5 |
| Psychologist                                                                                                                             | 98 | 69.0 | 26 | 78.8 |
| Addiction specialist                                                                                                                     | 54 | 38.0 | 21 | 63.6 |
| Pharmacological                                                                                                                          | 7  | 4.9  | 1  | 3.0  |
| General Practitioner                                                                                                                     | 17 | 12.0 | 2  | 6.1  |
| All of the above                                                                                                                         | 72 | 50.7 | 24 | 72.7 |
| Other                                                                                                                                    | 11 | 7.8  | 3  | 9.1  |
| None                                                                                                                                     | 30 | 21.1 | 4  | 12.1 |
| <b>Are there any services you would be less likely to refer to or suggest to clients/individuals with addictive eating? <sup>c</sup></b> |    |      |    |      |
| Counselling                                                                                                                              | 6  | 4.2  | 0  | 0.0  |
| Psychologist                                                                                                                             | 2  | 1.4  | 0  | 0.0  |
| Addiction specialist                                                                                                                     | 33 | 23.2 | 0  | 0.0  |
| Pharmacological                                                                                                                          | 65 | 45.8 | 21 | 63.6 |
| General Practitioner                                                                                                                     | 58 | 40.9 | 18 | 54.6 |

|                                                                                                                                                          |    |      |    |      |
|----------------------------------------------------------------------------------------------------------------------------------------------------------|----|------|----|------|
| All of the above                                                                                                                                         | 7  | 4.9  | 0  | 0.0  |
| Other                                                                                                                                                    | 2  | 1.4  | 1  | 3.0  |
| None                                                                                                                                                     | 46 | 32.4 | 0  | 0.0  |
| <b>Are there any particular sub-groups of overweight and obese people you feel would benefit more from a diagnosis of addictive eating? <sup>c</sup></b> |    |      |    |      |
| Overeaters                                                                                                                                               | 60 | 42.3 | 19 | 57.6 |
| Individuals with binge eating disorder                                                                                                                   | 59 | 41.6 | 21 | 63.6 |
| Children                                                                                                                                                 | 7  | 4.9  | 7  | 21.2 |
| Individuals with low motivation to engage with treatment                                                                                                 | 23 | 16.2 | 7  | 21.2 |
| Individuals with a mental health condition                                                                                                               | 43 | 30.3 | 17 | 51.5 |
| Individuals with other mental illnesses                                                                                                                  | 30 | 21.1 | 14 | 42.4 |
| Individuals with substance disorders                                                                                                                     | 29 | 20.4 | 7  | 21.2 |
| Other                                                                                                                                                    | 16 | 11.3 | 1  | 3.0  |
| No                                                                                                                                                       | 54 | 38.0 | 4  | 12.1 |
| <b>In your opinion, how much control does someone with addictive eating have over their eating habits?</b>                                               |    |      |    |      |
| A great deal                                                                                                                                             | 5  | 3.5  | 0  | 0.0  |
| A lot                                                                                                                                                    | 7  | 4.9  | 2  | 6.1  |
| A moderate amount                                                                                                                                        | 50 | 35.2 | 10 | 30.3 |
| A little                                                                                                                                                 | 70 | 49.3 | 19 | 57.6 |
| None at all                                                                                                                                              | 10 | 7.0  | 2  | 6.1  |
| <b>In your opinion, how much control does someone with addictive eating have over their weight?</b>                                                      |    |      |    |      |
| A great deal                                                                                                                                             | 2  | 1.4  | 0  | 0.0  |
| A lot                                                                                                                                                    | 1  | 0.7  | 1  | 3.0  |
| A moderate amount                                                                                                                                        | 32 | 22.5 | 12 | 36.4 |
| A little                                                                                                                                                 | 62 | 43.7 | 15 | 45.5 |
| None at all                                                                                                                                              | 45 | 31.7 | 5  | 15.2 |
| <b>In your opinion, how much responsibility does someone with addictive eating have to gain control over their eating and weight? <sup>a</sup></b>       |    |      |    |      |
| 100% responsible                                                                                                                                         | 6  | 4.2  | 6  | 18.2 |
| Very responsible                                                                                                                                         | 38 | 26.8 | 13 | 39.4 |
| Moderately responsible                                                                                                                                   | 56 | 39.4 | 11 | 33.3 |
| Not very responsible                                                                                                                                     | 18 | 12.7 | 2  | 6.1  |
| Not responsible                                                                                                                                          | 24 | 16.9 | 1  | 3.0  |
| <b>Do you think that the term 'food addiction' is stigmatizing for individuals?</b>                                                                      |    |      |    |      |
| Yes                                                                                                                                                      | 76 | 53.5 | 12 | 36.4 |

|                                                                                                                                                                |     |      |    |      |
|----------------------------------------------------------------------------------------------------------------------------------------------------------------|-----|------|----|------|
| Unsure                                                                                                                                                         | 41  | 28.9 | 11 | 33.3 |
| No                                                                                                                                                             | 25  | 17.6 | 10 | 30.3 |
| <b>How well do you think the term food addiction relates to the experiences of people with weight issues? <sup>a</sup></b>                                     |     |      |    |      |
| Extremely well                                                                                                                                                 | 10  | 7.0  | 3  | 9.1  |
| Very well                                                                                                                                                      | 31  | 21.8 | 15 | 45.5 |
| Neutral                                                                                                                                                        | 28  | 19.7 | 7  | 21.2 |
| Somewhat well                                                                                                                                                  | 33  | 23.2 | 6  | 18.2 |
| Not at all well                                                                                                                                                | 40  | 28.2 | 2  | 6.1  |
| <b>Select which term you feel is most appropriate to describe food addiction/addictive eating?</b>                                                             |     |      |    |      |
| Food addiction                                                                                                                                                 | 17  | 12.0 | 6  | 18.2 |
| Addictive eating                                                                                                                                               | 25  | 17.6 | 9  | 27.3 |
| Compulsive overeating                                                                                                                                          | 33  | 23.2 | 8  | 24.2 |
| Compulsive overeating disorder                                                                                                                                 | 20  | 14.1 | 7  | 21.2 |
| Other                                                                                                                                                          | 27  | 19.0 | 2  | 6.1  |
| None, no term needed                                                                                                                                           | 20  | 14.1 | 1  | 3.0  |
| <b>How confident do you feel in your knowledge on the latest evidence relating to addictive eating (i.e. assessment methodologies/treatment)? <sup>a</sup></b> |     |      |    |      |
| Extremely confident                                                                                                                                            | 26  | 18.3 | 0  | 0.0  |
| Very confident                                                                                                                                                 | 24  | 16.9 | 2  | 6.1  |
| Neutral                                                                                                                                                        | 30  | 21.1 | 11 | 33.3 |
| Somewhat confident                                                                                                                                             | 25  | 17.6 | 9  | 27.3 |
| Not at all confident                                                                                                                                           | 37  | 26.1 | 11 | 33.3 |
| <b>How would you rate your current knowledge about addictive eating? <sup>a</sup></b>                                                                          |     |      |    |      |
| Excellent                                                                                                                                                      | 29  | 20.4 | 1  | 3.0  |
| Good                                                                                                                                                           | 31  | 21.8 | 5  | 15.2 |
| Average                                                                                                                                                        | 49  | 34.5 | 8  | 24.2 |
| Poor                                                                                                                                                           | 30  | 21.1 | 19 | 57.6 |
| Terrible                                                                                                                                                       | 3   | 2.1  | 0  | 0.0  |
| <b>What sources of information have informed your understanding of addictive eating? <sup>c</sup></b>                                                          |     |      |    |      |
| Education                                                                                                                                                      | 83  | 58.5 | 19 | 57.6 |
| Traditional media                                                                                                                                              | 13  | 9.2  | 8  | 24.2 |
| Social media                                                                                                                                                   | 18  | 12.7 | 18 | 54.6 |
| Scientific literature                                                                                                                                          | 100 | 70.4 | 16 | 48.5 |
| Conferences                                                                                                                                                    | 63  | 44.4 | 5  | 15.2 |

|                                    |     |      |    |      |
|------------------------------------|-----|------|----|------|
| Colleagues                         | 108 | 76.1 | 15 | 45.5 |
| Other reading                      | 24  | 16.9 | 3  | 9.1  |
| Have not heard of addictive eating | 4   | 2.8  | 3  | 9.1  |

**If training for addictive eating was available, how interested would you be in participating in training delivered using technologies such as the internet and/or smartphones?**

|                       |    |      |    |      |
|-----------------------|----|------|----|------|
| Very interested       | 59 | 41.6 | 16 | 48.5 |
| Interested            | 23 | 16.2 | 7  | 21.2 |
| Somewhat interested   | 17 | 12.0 | 7  | 21.2 |
| Not very interested   | 8  | 5.6  | 2  | 6.1  |
| Not at all interested | 35 | 24.7 | 1  | 3.0  |

**In your opinion, who should be trained in addictive eating assessment and treatment? <sup>c</sup>**

|                        |    |      |    |      |
|------------------------|----|------|----|------|
| Undergraduate students | 21 | 14.8 | 17 | 48.5 |
| Practice nurses        | 18 | 12.7 | 7  | 21.2 |
| Dietitians             | 65 | 45.8 | 22 | 66.7 |
| Psychologists          | 61 | 43.0 | 21 | 63.6 |
| Psychiatrists          | 41 | 28.9 | 14 | 42.4 |
| General Practitioners  | 42 | 29.6 | 10 | 30.3 |
| Medical Specialists    | 24 | 16.9 | 9  | 27.3 |
| All of the above       | 57 | 40.1 | 16 | 48.5 |
| Other                  | 37 | 26.1 | 1  | 3.0  |

**If food addiction/addictive eating became a diagnostic term, what kinds of professional development training do you think would be needed (for yourself/other professions)? <sup>c</sup>**

|                                                   |     |      |    |      |
|---------------------------------------------------|-----|------|----|------|
| Understanding addiction terminology               | 93  | 65.5 | 30 | 90.9 |
| Understanding treatment (medical & non-medical)   | 104 | 73.2 | 30 | 90.9 |
| Assessment/diagnosis                              | 104 | 73.2 | 30 | 90.9 |
| Evidence-based treatment                          | 112 | 78.9 | 30 | 90.9 |
| How to minimise stigma                            | 94  | 66.2 | 20 | 60.6 |
| Neuroscience behind addictive eating              | 91  | 64.1 | 28 | 84.9 |
| Foods to avoid                                    | 49  | 34.5 | 10 | 30.3 |
| Behavioural approaches as well as food e.g. sleep | 98  | 69.0 | 31 | 93.9 |
| Other                                             | 34  | 23.9 | 2  | 6.1  |

**What would be your preferred method of delivery of professional development training? <sup>c, d</sup>**

|                    |    |      |   |      |
|--------------------|----|------|---|------|
| Online, self-paced | 69 | 48.6 | 8 | 24.2 |
|--------------------|----|------|---|------|



|                                                                                                                                         |    |      |    |      |
|-----------------------------------------------------------------------------------------------------------------------------------------|----|------|----|------|
| Face to face                                                                                                                            | 66 | 46.5 | 15 | 45.5 |
| Structured short course                                                                                                                 | 44 | 31.0 | 19 | 57.6 |
| Professional development                                                                                                                | 55 | 38.7 | 10 | 30.3 |
| Delivered by a credential source                                                                                                        | 37 | 26.1 | 14 | 42.4 |
| Other                                                                                                                                   | 13 | 9.2  | 0  | 0.0  |
| <b>Do you think online training/management/treatment delivered by health professionals would be of interest to clients/individuals?</b> |    |      |    |      |
| Yes                                                                                                                                     | 78 | 54.9 | 23 | 69.7 |
| Maybe                                                                                                                                   | 48 | 33.8 | 8  | 24.2 |
| No                                                                                                                                      | 16 | 11.3 | 2  | 6.1  |
| <b>Do you think online training would be of interest to your co-workers/colleagues/peers?</b>                                           |    |      |    |      |
| Yes                                                                                                                                     | 78 | 54.9 | 22 | 66.7 |
| Maybe                                                                                                                                   | 46 | 32.4 | 8  | 24.2 |
| No                                                                                                                                      | 18 | 12.7 | 3  | 9.1  |

<sup>a</sup> Indicates statistically significant difference in responses between health professionals and health professionals in training assessed by chi square test ( $p < 0.05$ ). <sup>b</sup> N=138 responses (i.e. those that believe addictive eating exists). <sup>c</sup> Multiple response questions i.e. percentages add to >100. Chi square tests to determine significant differences were not performed for these questions as the responses are not mutually exclusive (i.e. test assumptions not met). <sup>d</sup> Reported as the N(%) who ranked responses as 1 or 2.
